# Supplementary material for: Considering decoupled phenotypic diversification between ontogenetic phases in macroevolution: An example using Triggerfishes (Balistidae)
Source: bioRxiv or medRxiv preprint supplement (doi:10.1101/2022.01.11.475856), 2022-01-12
Supplement: Supplementary file [file media-1.pdf]

## Supplementary Materials

### *Systematic Biology*

#### Considering ontogenetic phases of diversification in macroevolution: An example using Triggerfishes (Balistidae)

Alex Dornburg, Katerina L. Zapfe, Rachel Williams, Michael E. Alfaro, Richard Morris,  
Haruka Adachi, Joseph Flores, Francesco Santini, Thomas J. Near, Bruno Frédérick

### Contents

|                                                                                                      |    |
|------------------------------------------------------------------------------------------------------|----|
| Table S1. Location of specimens examined for this study.....                                         | 2  |
| Table S2. Habitat classification and data from the primary literature. ....                          | 8  |
| Table S3. Genbank Accessions.....                                                                    | 10 |
| Table S4. Best-fit nucleotide substitution models and partitioning strategies.....                   | 15 |
| Table S5. Taxon coverage of phenotypic data. ....                                                    | 16 |
| Table S6. Percent variation captured by each relative warp axis.....                                 | 18 |
| Fig. S1. Landmarks and measurements used for analyses. ....                                          | 19 |
| Fig. S2. Divergence time estimates of Balistidae. ....                                               | 20 |
| Fig. S3. Visualizing the decoupling of macroevolutionary dynamics between adults and juveniles ..... | 21 |
| References.....                                                                                      | 22 |

Supplemental Table 1: Location of specimens examined for this study

| Species                     | Burke<br>Museum                 | Bishop<br>Museum | Philadelphia<br>Academy of<br>Sciences | LA County<br>Museum | Yale Peabody<br>Museum                       | Museum of<br>Comparative<br>Zoology                                           | Field Museum                              | North<br>Carolina<br>Museum of<br>Natural<br>Sciences                                                                                                                                                                                                                             |
|-----------------------------|---------------------------------|------------------|----------------------------------------|---------------------|----------------------------------------------|-------------------------------------------------------------------------------|-------------------------------------------|-----------------------------------------------------------------------------------------------------------------------------------------------------------------------------------------------------------------------------------------------------------------------------------|
| <i>Abalistes stellaus</i>   | ----                            | ---              | 117657 (a-b)<br>117656<br>90440        | ---                 | ---                                          | 27048<br>24320<br>3758                                                        |                                           |                                                                                                                                                                                                                                                                                   |
| <i>Balistapus undulatus</i> | UW 009104<br>UW 017709<br>(a-d) | ---              | ---                                    | ---                 | 7168<br>7169<br>8325<br>9816<br>7167<br>9544 | 63172<br>26356                                                                | 4747<br>89708<br>90739<br>91474<br>110921 |                                                                                                                                                                                                                                                                                   |
| <i>Balistes capriscus</i>   | UW 005164<br>UW 016887          | ---              | 102579<br>102745<br>102579             | ---                 | 14006                                        | 62199<br>23972<br>11941<br>26654<br>11946<br>24148<br>54378<br>35799<br>23971 | 4883<br>46697<br>46828<br>48897           | 4551; 4763;<br>5935; 5990;<br>7864; 9077;<br>9132; 9510;<br>11471<br>11705<br>13030<br>15117<br>15587<br>17332<br>10159<br>10171;<br>3976 4906;<br>4985 7875;<br>9816<br>23245<br>27138<br>27157<br>27158<br>27234<br>27244<br>28197<br>28230<br>28275<br>30383<br>30485<br>31204 |

45348  
31204  
45348  
48942  
48953  
48970  
48984  
48987  
49031  
49054  
49068  
49092  
49156  
49171  
49174  
49180  
49203  
49276  
49297  
49316  
49349  
49477  
49500  
49513  
49533  
49557  
49559  
49579  
49618  
49625  
49632  
49644  
49654  
49687  
49698  
49704  
49738  
49745  
49750  
49773  
49837  
49840  
49857  
49877

|                                     |                        |      |                            |                     |       |                                                    |                                  |       |
|-------------------------------------|------------------------|------|----------------------------|---------------------|-------|----------------------------------------------------|----------------------------------|-------|
|                                     |                        |      |                            |                     |       |                                                    |                                  | 49911 |
|                                     |                        |      |                            |                     |       |                                                    |                                  | 49968 |
|                                     |                        |      |                            |                     |       |                                                    |                                  | 49982 |
|                                     |                        |      |                            |                     |       |                                                    |                                  | 49988 |
|                                     |                        |      |                            |                     |       |                                                    |                                  | 51953 |
|                                     |                        |      |                            |                     |       |                                                    |                                  | 51976 |
|                                     |                        |      |                            |                     |       |                                                    |                                  | 51985 |
|                                     |                        |      |                            |                     |       |                                                    |                                  | 51986 |
|                                     |                        |      |                            |                     |       |                                                    |                                  | 51998 |
|                                     |                        |      |                            |                     |       |                                                    |                                  | 52002 |
|                                     |                        |      |                            |                     |       |                                                    |                                  | 52038 |
|                                     |                        |      |                            |                     |       |                                                    |                                  | 57384 |
|                                     |                        |      |                            |                     |       |                                                    |                                  | 60221 |
|                                     |                        |      |                            |                     |       |                                                    |                                  | 60223 |
|                                     |                        |      |                            |                     |       |                                                    |                                  | 60234 |
|                                     |                        |      |                            |                     |       |                                                    |                                  | 60297 |
|                                     |                        |      |                            |                     |       |                                                    |                                  | 71477 |
|                                     |                        |      |                            |                     |       |                                                    |                                  | 49876 |
|                                     |                        |      |                            |                     |       |                                                    |                                  | 49999 |
| <i>Balistes polylepis</i>           | UW 014876<br>UW 025817 | ---  | 103797<br>103801<br>103793 | ---                 | 893   | 11929                                              | 73535                            | 30333 |
| <i>Balistes punctatus</i>           | ----                   | ---  | 102835<br>103227           | ---                 | ---   | ---                                                | ---                              |       |
| <i>Balistes vetula</i>              | ----                   | ---  | 103907 (a-b)<br>103863     | ---                 | ---   | 30168<br>11906<br>11877<br>11878<br>32900<br>11928 | 15638<br>47961<br>52837<br>65379 | 48110 |
| <i>Balistoides<br/>conspicillum</i> | ----                   | 9484 | 103896                     | 38229-12<br>54166-1 | 15135 | 15135                                              | 112946                           | 78129 |
| <i>Balistoides<br/>viridescens</i>  | ----                   | ---  | 130942<br>113798<br>103894 | ---                 | ---   | 11914<br>36907                                     | 110922                           |       |

|                              |                                              |       |                               |     |      |        |        |        |
|------------------------------|----------------------------------------------|-------|-------------------------------|-----|------|--------|--------|--------|
| <i>Canthidermis maculata</i> | UW 048621                                    | ---   | 108895                        | --- | ---  | 146629 | 48578  | 17356  |
|                              |                                              |       | 15356                         |     |      | 11874  | 61360  | 102516 |
|                              |                                              |       | 103895                        |     |      | 55503  | 74559  | 23252  |
|                              |                                              |       |                               |     |      |        | 113476 | 20281  |
|                              |                                              |       |                               |     |      |        |        | 49164  |
|                              |                                              |       |                               |     |      |        |        | 49299  |
|                              |                                              |       |                               |     |      |        |        | 49337  |
|                              |                                              |       |                               |     |      |        |        | 49370  |
|                              |                                              |       |                               |     |      |        |        | 49394  |
|                              |                                              |       |                               |     |      |        |        | 49853  |
|                              |                                              |       |                               |     |      |        |        | 49891  |
|                              |                                              |       |                               |     |      |        |        | 49964  |
|                              |                                              |       |                               |     |      |        |        | 49990  |
|                              |                                              |       |                               |     |      |        |        | 57658  |
|                              |                                              |       |                               |     |      |        |        | 60242  |
|                              |                                              |       | <i>Canthidermis sufflamen</i> |     |      |        |        |        |
|                              |                                              | 60258 |                               |     |      |        |        |        |
|                              |                                              | 60281 |                               |     |      |        |        |        |
|                              |                                              | 60335 |                               |     |      |        |        |        |
|                              |                                              | 30986 |                               |     |      |        |        |        |
|                              |                                              | 5032  |                               |     |      |        |        |        |
|                              |                                              | 27162 |                               |     |      |        |        |        |
|                              |                                              | 49541 |                               |     |      |        |        |        |
|                              |                                              | 49541 |                               |     |      |        |        |        |
|                              |                                              | 49681 |                               |     |      |        |        |        |
|                              |                                              | 49844 |                               |     |      |        |        |        |
|                              |                                              | 49856 |                               |     |      |        |        |        |
|                              |                                              | 49874 |                               |     |      |        |        |        |
|                              |                                              | 49896 |                               |     |      |        |        |        |
|                              |                                              | 71861 |                               |     |      |        |        |        |
|                              |                                              | 49844 |                               |     |      |        |        |        |
|                              |                                              | 57243 |                               |     |      |        |        |        |
| <i>Melichthys niger</i>      | UW 048380<br>UW 000546<br>UW 026434<br>(a-b) | ---   | 103657                        | --- | 8674 | 11918  | 91152  |        |
|                              |                                              |       |                               |     |      | 11919  |        |        |
|                              |                                              |       |                               |     |      |        |        |        |
| <i>Melichthys vidua</i>      | UW 000542<br>UW 013045                       | ---   | 131925 (a-b)                  | --- | ---  | 11912  | 16400  |        |
|                              |                                              |       |                               |     |      | 163091 | 21572  |        |
|                              |                                              |       |                               |     |      |        | 21744  |        |
| <i>Odonus niger</i>          | UW 010542<br>(a-b)<br>UW 013061              | ---   | 103873                        | --- | 9822 | 11913  | 19935  |        |
|                              |                                              |       | 102779                        |     | 8326 | 5896   | 21944  |        |
|                              |                                              |       |                               |     |      |        | 31725  |        |

|                                       |                                                                                                       |                |                            |                       |              |                                     |                                           |                  |
|---------------------------------------|-------------------------------------------------------------------------------------------------------|----------------|----------------------------|-----------------------|--------------|-------------------------------------|-------------------------------------------|------------------|
|                                       |                                                                                                       |                |                            |                       |              |                                     | 31726                                     |                  |
|                                       |                                                                                                       |                |                            |                       |              |                                     | 110923                                    |                  |
| <i>Pseudobalistes flavimarginatus</i> | ----                                                                                                  | 12211<br>28375 | 102420                     | 35973<br>56845        | ---          | 11900<br>24362                      | ---                                       |                  |
| <i>Pseudobalistes fuscus</i>          | ----                                                                                                  | ---            | 103841 (a-b)               | ---                   | ---          | 3770<br>3759<br>6158<br>11893 (a-c) | ---                                       |                  |
| <i>Pseudobalistes naufragium</i>      | ----                                                                                                  | ---            | 103800<br>103905<br>100258 | 3449<br>3450          | ---          | 41405<br>50737                      | ---                                       |                  |
| <i>Rhinecanthus aculeatus</i>         | UW 008237<br>UW 013063<br>UW 013064<br>UW 014387<br>UW 017710<br>(a-c)<br>UW 018647<br>UW 018649      | ---            | ---                        | -----                 | 7184<br>9613 | ---                                 | 47792<br>63522<br>76682<br>89707<br>LW-15 | 79605<br>WCS-915 |
| <i>Rhinecanthus assasi</i>            | ----                                                                                                  | ---            | ---                        | ---                   | 20551        | 50082<br>440                        | ---                                       |                  |
| <i>Rhinecanthus rectangulus</i>       | UW 013053<br>UW 011096<br>UW 016610<br>(a-b)<br>UW 026440<br>UW 026439<br>UW un-<br>cataloged<br>(2X) | ---            | ---                        | ---                   | ---          | ---                                 | 44227<br>44229<br>44231<br>55641          | 30485            |
| <i>Rhinecanthus verrucosus</i>        | UW 009159                                                                                             | ---            | 130753<br>91393            | ---                   | ---          | 24868<br>30516                      | 3975<br>52000                             |                  |
| <i>Sufflamen bursa</i>                | ----                                                                                                  | ---            | ---                        | 42474<br>1245<br>1244 | ---          | 5898                                | 16399<br>47703<br>63681<br>73656          | 77393            |
| <i>Sufflamen chrysopterum</i>         | UW 008645<br>(a-c)                                                                                    | ---            | 63882                      | ---                   | 8327         | 8327                                | ---                                       |                  |

UW 009210  
 UW 9379  
 UW 9106

|                                        |      |                            |                                      |                                             |             |                                  |       |                |
|----------------------------------------|------|----------------------------|--------------------------------------|---------------------------------------------|-------------|----------------------------------|-------|----------------|
| <i>Sufflamen fraenatum</i>             | ---- | ---                        | 105589 (a-c)<br>815933               | ---                                         | ---         | 29740                            | 73660 |                |
| <i>Sufflamen verres</i>                | ---- | ---                        | 100283<br>100251<br>100252<br>103809 | ---                                         | 1095<br>814 | 29628<br>36524<br>45781<br>29716 | ---   |                |
| <i>Xanthichthys<br/>auromarginatus</i> | ---- | 35394 (a-c)<br>10088 (a-b) | 134540<br>134542 (a-c)               | 45004                                       | ---         | ---                              | ---   |                |
| <i>Xanthichthys mento</i>              | ---- | ---                        | 68601                                | 8999-16<br>31778-57<br>31778-60<br>31778-61 | ---         | ---                              | ---   |                |
| <i>Xanthichthys ringens</i>            | ---- | ---                        | 100989 (a-c)<br>157639 (a-b)         | ---                                         | 6247        | 6247<br>11940                    | ---   | 52104<br>57424 |

**Supplemental Table 2: Habitat classification and data from the primary literature**

|                                       | Reef/<br>Non-Reef | Flow | Habitat     | Reference                                                                 |
|---------------------------------------|-------------------|------|-------------|---------------------------------------------------------------------------|
| <b>ADULT</b>                          |                   |      |             |                                                                           |
| <i>Abalistes stellaris</i>            | Reef              | 1    | 10          | Fisher et al. (1990)                                                      |
| <i>Abalistes stellatus</i>            | Reef              | 1    | 10          | Bray (2011)                                                               |
| <i>Balistes undulates</i>             | Reef              | 3    | 4,6,7,12    | Myers (1991), Bean et al. (2002), Kuwamura (1991)                         |
| <i>Balistes capriscus</i>             | Non-Reef          | 3    | 4,6,9       | Aiken (1975), Nunoo et al. (2006)                                         |
| <i>Balistes polylepis</i>             | Non-Reef          | 3    | 10,1,11     | Randall and Mundy (1998), Thomson et al. (1979), Kells et al. (2016)      |
| <i>Balistes punctatus</i>             | Non-Reef          | 3    | 10,1,11     | Nunoo et al. (2006)                                                       |
| <i>Balistes vetula</i>                | Reef              | 3    | 1,2,6,11,12 | Aiken (1975), Cervigón et al. (1992), Lyczkowski-Shultz and Ingram (2003) |
| <i>Balistoides conspicillum</i>       | Reef              | 2    | 6           | Myers (1991), Kulter and Tonozuka (2001)                                  |
| <i>Balistoides viridescens</i>        | Reef              | 3    | 4,6         | Myers (1991), Kuwamura (1991)                                             |
| <i>Canthidermis maculata</i>          | Non-Reef          | 2    | 5,9         | Aiken (1975), Lyczkowski-Shultz and Ingram (2003)                         |
| <i>Canthidermis sufflamen</i>         | Non-Reef          | 2    | 5,6,8,9     | Aiken (1975), Myers (1991), Lyczkowski-Shultz and Ingram (2003)           |
| <i>Melichthys indicus</i>             | Reef              | 2    | 8           | Kulter and Tonozuka                                                       |
| <i>Melichthys niger</i>               | Reef              | 3    | 1,6,7,8,12  | Aiken (1975), Myers (1991), Kells et al. (2016)                           |
| <i>Melichthys vidua</i>               | Reef              | 2    | 6           | Myers (1991), Bean et al. (2002), Kuwamura (1991)                         |
| <i>Odonus niger</i>                   | Reef              | 2    | 6,7         | Myers (1991), Kuwamura (1991)                                             |
| <i>Pseudobalistes flavimarginatus</i> | Reef              | 1    | 1,4,12      | Myers (1991)                                                              |
| <i>Pseudobalistes fuscus</i>          | Reef              | 3    | 1,4,6,10,12 | Myers (1991), Kuwamura (1991)                                             |
| <i>Pseudobalistes naufragium</i>      | Non-Reef          | 3    | 1,6,12      | Bussing (1995)                                                            |
| <i>Rhinecanthus aculeatus</i>         | Reef              | 1    | 1,4,12      | Myers (1991), Kuwamura (1991), Hoover (2003)                              |
| <i>Rhinecanthus assasi</i>            | Reef              | 1    | 1,10        | Lieske and Myers (1994), Kulter and Tonozuka (2001),                      |
| <i>Rhinecanthus lunula</i>            | Reef              | 2    | 6           | Bacchet et al. (2006)                                                     |
| <i>Rhinecanthus rectangulus</i>       | Reef              | 3    | 1,6,12      | Myers (1991), Kuwamura (1991), Matsuura (2001)                            |
| <i>Rhinecanthus verrucosus</i>        | Reef              | 1    | 2,4,12      | Myers (1991), Bean et al. (2002), Kuwamura (1991)                         |
| <i>Sufflamen albicaudatum</i>         | Reef              | 1    | 1           | Myers (1991)                                                              |
| <i>Sufflamen bursa</i>                | Reef              | 1    | 6,8,12      | Myers (1991), Bean et al. (2002)                                          |
| <i>Sufflamen chrysopterum</i>         | Reef              | 3    | 1,4,6       | Myers (1991), Bean et al. (2002), Kuwamura (1991)                         |
| <i>Sufflamen fraenatum</i>            | Reef              | 1    | 1,11,12     | Myers (1991), Kuwamura (1991)                                             |
| <i>Sufflamen verres</i>               | Reef              | 1    | 1,11        | Thomson et al. (1979)                                                     |
| <i>Xanthichthys auromarginatus</i>    | Non-Reef          | 2    | 7,6,8       | Kulter and Tonozuka (2001), Hoover (2003)                                 |
| <i>Xanthichthys lineopunctatus</i>    | Reef              | 2    | 6           | Kulter and Tonozuka (2001)                                                |
| <i>Xanthichthys mento</i>             | Reef              | 3    | 8,11        | Kulter and Tonozuka (2001), Hoover (2003), Kells et al. (2016)            |



*Xanthichthys ringens* Reef 2 8 Aiken (1975), Lieske and Myers (1994), Lyczkowski-Shultz and Ingram (2003)

---

**JUVENILE**

|                                     |   |      |                                                                                                               |
|-------------------------------------|---|------|---------------------------------------------------------------------------------------------------------------|
| <i>Abalistes stellatus</i>          | 1 | 9    | Kulter and Tonozuka (2001)                                                                                    |
| <i>Balistapus undulates</i>         | 3 | 6,12 | Bean et al. (2002), Kuwamura (1991)                                                                           |
| <i>Balistes capriscus</i>           | 1 | 9    | Longley and Hildebrand (1941), Clements et al. (1991), Hoffmayer et al. (2005), Ballard and Rakocinski (2005) |
| <i>Balistes polylepis</i>           | 1 | 1,9  | Thomson et al. (1979), Kells et al. (2016)                                                                    |
| <i>Balistes vetula</i>              | 1 | 9,12 | Robertson (1998)                                                                                              |
| <i>Balistoides conspicillum</i>     | 1 | 8    | Kulter and Tonozuka (2001)                                                                                    |
| <i>Balistoides viridiscens</i>      | 1 | 1    | Kuwamura (1991)                                                                                               |
| <i>Canthidermis maculata</i>        | 1 | 9    | Clements et al. (1991), Hoffmayer et al. (2005)                                                               |
| <i>Canthidermis sufflamen</i>       | 1 | 9    | Clements et al. (1991), Hoffmayer et al. (2005)                                                               |
| <i>Melichthys vidua</i>             | 1 | 6,12 | Bean et al. (2002), Kuwamura (1991)                                                                           |
| <i>Odonus niger</i>                 | 1 | 1    | Kuwamura (1991)                                                                                               |
| <i>Pseudobalistes fuscus</i>        | 1 | 1,9  | Kuwamura (1991)                                                                                               |
| <i>Rhinecanthus aculeatus</i>       | 1 | 4    | Kuwamura (1991)                                                                                               |
| <i>Rhinecanthus assasi</i>          | 1 | 9,12 | Lieske and Myers (1994)                                                                                       |
| <i>Rhinecanthus<br/>rectangulus</i> | 1 | 12   | Kulter and Tonozuka (2001),                                                                                   |
| <i>Rhinecanthus<br/>verrucosus</i>  | 1 | 3,12 | Bean et al. (2002), Kuwamura (1991)                                                                           |
| <i>Sufflamen bursa</i>              | 1 | 12   | Bean et al. (2002)                                                                                            |
| <i>Sufflamen<br/>chrysopterum</i>   | 1 | 2,12 | Bean et al. (2002), Kuwamura (1991)                                                                           |
| <i>Sufflamen fraenatum</i>          | 1 | 2    | Kuwamura (1991)                                                                                               |
| <i>Xanthichthys ringens</i>         | 1 | 9    | Randall (1968), Clements et al. (1991)                                                                        |

Flow regimes range from (1) Low flow or sheltered habitat; (2) high flow or open habitat; and (3) mix of low and high/sheltered and open habitat. Habitat types: (1) debris/rubble; (2) sea grass; (3) mangrove; (4) lagoon; (5) epipelagic/pelagic; (6) outer reef; (7) surge zone/strong currents; (8) drop-off; (9) sargassum/floating debris; (10) sand flat; (11) rocky reef; (12) inner reef/sheltered reef.

Supplemental Table 3: Genbank Accessions

| Taxon                                | 12S          | 16S          | Rhodopsin | Tmo-4C4  | RAG1     | BMP4       | COI        | CYTB         | GLYT       | MYH6       | RAG2       |
|--------------------------------------|--------------|--------------|-----------|----------|----------|------------|------------|--------------|------------|------------|------------|
| <i>Abalistes stellaris</i>           |              |              |           |          |          | KT600846.1 | KF025667.1 | AP009202.1   |            |            | KT600890.1 |
| <i>Abalistes stellatus</i>           | AY70024<br>8 | AY67963<br>2 | EU108845  | EU108823 | AY700318 |            | KF025668.1 |              | JX190373.1 |            |            |
| <i>Acanthaluteres spilomelanurus</i> |              |              |           |          |          |            | KF025693.1 | KF025759.1   |            |            |            |
| <i>Acanthaluteres vittiger</i>       |              |              |           |          |          |            | KF025694.1 | KF025760.1   |            |            |            |
| <i>Acreichthys tomentosus</i>        |              |              |           |          |          |            | KF025695.1 | KF025761.1   | KF139659.1 |            |            |
| <i>Aluterus schoepfii</i>            |              |              |           |          |          | KT600848.1 | KF025698.1 | KF025764.1   |            |            |            |
| <i>Aluterus heudelotii</i>           |              |              |           |          |          |            | KF025696.1 | KF025762.1   |            |            |            |
| <i>Aluterus monceros</i>             |              |              |           |          |          |            | KF025697.1 | KF025763.1   |            |            |            |
| <i>Aluterus scriptus</i>             |              |              |           |          |          | KT600849.1 | KF025699.1 | KF025765.1   | KF027670.1 |            |            |
| <i>Amanses scopas</i>                |              |              |           |          |          |            | KF025700.1 | KF025766.1   | KF027671.1 | KT600891.1 | KT600891.1 |
| <i>Brachaluteres jacksonianus</i>    |              |              |           |          |          |            | KF025701.1 | KF025767.1 B |            |            |            |
| <i>Balistapus undulatus</i>          | EU10880<br>2 | EU1088<br>13 | EU108849  | EU108826 | EU108869 | KT600852.1 | JQ861003.1 | AP009203.1   | KF027662.1 |            | KT600894.1 |
| <i>Balistes capriscus</i>            | AY70023<br>8 | AY67962<br>2 | EU108846  | EU108824 | AY700308 | KT600853.1 | KF025670.1 | DQ197928.1   | KF139685.1 |            | DQ874786.1 |
| <i>Balistes polylepis</i>            | AY70023<br>9 | AY67962<br>3 | ---       | ---      | AY700309 | KT600854.1 | KF025673.1 | KF025738.1   |            |            | KT600896.1 |
| <i>Balistes punctatus</i>            | EU10880<br>1 | EU1088<br>12 | EU108848  | EU108827 | EU108868 | KT600855.1 | KF025674.1 | KF025739.1   |            |            | KT600897.1 |
| <i>Balistes vetula</i>               | AY70024<br>0 | AY67962<br>4 | EU108850  | EU108828 | AY700310 | KT600856.1 | KF025671.1 | AP009204.1   | KF027663.1 |            | KT600898.1 |
| <i>Balistoides conspicillum</i>      | AY70024<br>1 | AY67962<br>5 | EU108847  | EU108825 | AY700311 | KT600857.1 | KF025672.1 | AP009205.1   |            |            | KT600899.1 |

|                                    |              |              |          |          |          |            |            |            |            |            |
|------------------------------------|--------------|--------------|----------|----------|----------|------------|------------|------------|------------|------------|
| <i>Balistoides viridescens</i>     | AY70025<br>0 | AY67963<br>4 | ---      | ---      | AY700320 | KT600858.1 | KF025675.1 | KF025740.1 |            | KT600900.1 |
| <i>Cantherhines fronticinctus</i>  |              |              |          |          |          |            |            |            | KT600901.1 | KT600901.1 |
| <i>Cantherhines pardalis</i>       |              |              |          |          |          | KT600861.1 | KF025702.1 | KF025769.1 | KF027672.1 | KT600902.1 |
| <i>Cantherhines dumerilii</i>      |              |              |          |          |          | KT600859.1 |            | KF025768.1 |            |            |
| <i>Canthidermis maculata</i>       | AY70024<br>2 | AY67962<br>6 | EU108851 | EU108829 | AY700312 | KT600862.1 | KF025676.1 | AP009206.1 |            | KT600904.1 |
| <i>Canthidermis sufflamen</i>      |              |              |          |          |          | KT600863.1 |            |            |            | KT600905.1 |
| <i>Cantherhines pullus</i>         |              |              |          |          |          |            | KF025703.1 | KF025770.1 | JX190377.1 | KT600903.1 |
| <i>Cantherhines sandwichiensis</i> |              |              |          |          |          |            |            | KF025771.1 |            |            |
| <i>Chaetodermis penecilligerus</i> |              |              |          |          |          |            | KF025704.1 | KF025772.1 |            |            |
| <i>Diodon hystrix</i>              |              |              |          |          |          |            | KF025664.1 | KF025730.1 |            |            |
| <i>Eubalichthys Bucephalus</i>     |              |              |          |          |          |            | KF025705.1 | KF025773.1 |            |            |
| <i>Eubalichthys mosaicus</i>       |              |              |          |          |          |            | KF025706.1 | KF025774.1 |            |            |
| <i>Melichthys indicus</i>          |              |              |          |          |          |            | KF025677.1 | KF025742.1 |            |            |
| <i>Melichthys niger</i>            | AY70024<br>3 | AY67962<br>7 | EU108852 | ---      | AY700313 | KT600865.1 | KF025678.1 | KF025743.1 |            | KT600907.1 |
| <i>Melichthys vidua</i>            | EU10880<br>3 | EU1088<br>14 | EU108853 | EU108830 | EU108870 | KT600866.1 | KF025679.1 | AP009207.1 |            | KT600908.1 |
| <i>Meuschenia hippocrepis</i>      |              |              |          |          |          |            | KF025708.1 | KF025776.1 |            |            |
| <i>Meuschenia trachylepis</i>      |              |              |          |          |          |            | KF025709.1 | KF025777.1 |            |            |
| <i>Meuschenia freycineti</i>       |              |              |          |          |          |            | KF025707.1 | KF025775.1 |            |            |
| <i>Mola mola</i>                   |              |              |          |          |          |            | KF025665.1 | KF025731.1 |            |            |
| <i>Monacanthus chinensis</i>       |              |              |          |          |          |            | KF025710.1 | KF025778.1 | KF027673.1 |            |

|                                       |         |         |          |          |          |             |            |            |            |
|---------------------------------------|---------|---------|----------|----------|----------|-------------|------------|------------|------------|
| <i>Monacanthus ciliates</i>           |         |         |          |          |          |             | KF025711.1 | KF025779.1 |            |
| <i>Monacanthus tuckeri</i>            |         |         |          |          |          |             |            | KF025780.1 |            |
| <i>Nelusetta ayraudi</i>              |         |         |          |          |          |             | KF025712.1 | KF025781.1 |            |
| <i>Odonus niger</i>                   | EU10880 | EU1088  | EU108854 | EU108831 | EU108871 | KT600867.1  | KF025680.1 | AP009208.1 | KT600909.1 |
|                                       | 4       | 15      |          |          |          |             |            |            | 1          |
| <i>Oxymonacanthus longirostris</i>    |         |         |          |          |          | KT600868.1  | KF025713.1 | KF025782.1 | KF027674.1 |
|                                       |         |         |          |          |          |             |            | KT600910.1 | KT600910.1 |
| <i>Pergavor janthinosoma</i>          |         |         |          |          |          | KT600870.1  | KF025719.1 | KF025787.1 | KF139831.1 |
|                                       |         |         |          |          |          |             |            | KT600912.1 | KT600912.1 |
| <i>Pergavor melanocephalus</i>        |         |         |          |          |          | KT600881.1  | KF025720.1 | KF025788.1 |            |
|                                       |         |         |          |          |          |             |            | KT600913.1 | KT600913.1 |
| <i>Pergavor nigrolineatus</i>         |         |         |          |          |          |             | KF025721.1 | KF025789.1 | KF139832.1 |
|                                       |         |         |          |          |          |             |            | KT600914.1 | KT600914.1 |
| <i>Paraluteres prionurus</i>          |         |         |          |          |          | KT600869.1  | KF025714.1 | KF025783.1 | KF027675.1 |
|                                       |         |         |          |          |          |             |            | KT600911.1 | KT600911.1 |
| <i>Paramonacanthus choirocephalus</i> |         |         |          |          |          |             | KF025715.1 |            |            |
| <i>Paramonacanthus oblongus</i>       |         |         |          |          |          |             | KF025717.1 | KF025785.1 |            |
| <i>Paramonacanthus pusillus</i>       |         |         |          |          |          |             | KF025718.1 | KF025786.1 |            |
| <i>Paramonacanthus filicauda</i>      |         |         |          |          |          |             | KF025716.1 | KF025784.1 |            |
| <i>Peudomonacanthus peroni</i>        |         |         |          |          |          |             | KF025724.1 | KF025792.1 |            |
| <i>Peudomonacanthus macrurus</i>      |         |         |          |          |          |             | KF025723.1 | KF025791.1 |            |
| <i>Pseudobalistes naufragium</i>      |         |         |          |          |          |             |            | KF025746.1 | KT600917.1 |
| <i>Pseudobalistes flavimarginatus</i> | EU10880 | EU1088  | EU108855 | EU108832 | EU108872 | KT600872.1  |            | AP009209.1 | KF139856.1 |
|                                       | 5       | 16      |          |          |          |             |            |            | KT600915.1 |
| <i>Pseudobalistes fuscus</i>          | AY70024 | AY67962 | EU108856 | EU108833 | AY700314 | KT600873.1h | KF025681.1 | KF025745.1 | KT600916.1 |
|                                       | 4       | 8       |          |          |          |             |            |            | 1          |
| <i>Rhinecanthus abyssus</i>           |         |         |          |          |          |             | KT600875.1 |            | KT600918.1 |
| <i>Pseudobalistes naufragium</i>      | GU01446 | GU0144  | GU014454 | GU014453 | GU014460 | KT600874.1  | KF025682.1 |            |            |
|                                       | 4       | 61      |          | Pending  |          |             |            |            |            |

|                                   |              |              |          |          |          |            |            |            |            |            |
|-----------------------------------|--------------|--------------|----------|----------|----------|------------|------------|------------|------------|------------|
| <i>Pseudodalutarius nascornis</i> |              |              |          |          |          |            | KF025722.1 | KF025790.1 |            |            |
| <i>Ranzania laevis</i>            |              |              |          |          |          |            | KF025666.1 |            |            |            |
| <i>Rhinecanthus aculeatus</i>     | AY70024<br>7 | AY67963<br>1 | EU108857 | EU108834 | AY308790 | KT600876.1 | KF025683.1 | AP009210.1 | KF027664.1 | KT600919.1 |
| <i>Rhinecanthus assasi</i>        | AY70024<br>5 | AY67962<br>9 | EU108858 | EU108835 | AY700315 | KT600877.1 | KF025684.1 | KF025748.1 |            | KT600920.1 |
| <i>Rhinecanthus lunula</i>        | EU10880<br>6 | EU1088<br>17 | EU108859 | EU108836 | EU108873 |            | KF025685.1 | KF025749.1 |            |            |
| <i>Rhinecanthus rectangulus</i>   | EU10880<br>7 | EU1088<br>18 | EU108860 | EU108837 | EU108874 | KT600878.1 | KF025686.1 | KF025750.1 |            | KT600921.1 |
| <i>Rhinecanthus verrucosus</i>    | EU10880<br>8 | EU1088<br>19 | EU108861 | EU108838 | EU108875 | KT600879.1 | KF025687.1 | KF025751.1 | KF139869.1 |            |
| <i>Ranzania laevis</i>            |              |              |          |          |          |            |            | KF025732.1 |            |            |
| <i>Rudarius ercodes</i>           |              |              |          |          |          |            | KF025725.1 |            |            |            |
| <i>Stephanolepis auratus</i>      |              |              |          |          |          |            | KF025727.1 |            |            |            |
| <i>Scobinichthys granulatus</i>   |              |              |          |          |          |            | KF025726.1 | KF025793.1 |            |            |
| <i>Stephanolepis hispidus</i>     |              |              |          |          |          | KT600880.1 | KF025729.1 | KF025795.1 | KF139893.1 | KT600922.1 |
| <i>Stephanolepis setifer</i>      |              |              |          |          |          | KT600881.1 |            | KF025796.1 |            | KT600923.1 |
| <i>Stephanolepis cirrifer</i>     |              |              |          |          |          |            | KF025728.1 | KF025794.1 | KF027676.1 |            |
| <i>Sufflamen albicaudatum</i>     | EU10880<br>9 | EU1088<br>20 | EU108862 | EU108839 | EU108876 |            |            | KF025798.1 |            |            |
| <i>Sufflamen bursa</i>            | AY70024<br>9 | AY67963<br>3 | EU108863 | EU108840 | AY700319 | KT600882.1 |            | KF025752.1 |            | KT600924.1 |
| <i>Sufflamen chrysopterum</i>     | AY70025<br>1 | AY67963<br>4 | EU108864 | EU108841 | ---      | KT600883.1 |            | KF025753.1 | KF139894.1 | KT600925.1 |
| <i>Sufflamen fraenatum</i>        | NC           | NC           | ---      | ---      | AY700321 | KT600884.1 |            | AP004456.1 |            | KT600926.1 |



**Supplemental Table 4: Best-fit nucleotide substitution models and partitioning strategies identified by PartitionFinder.**

| <b>Subset</b> | <b>Best Model</b> | <b># of Sites</b> | <b>Contained Partitions</b>                          |
|---------------|-------------------|-------------------|------------------------------------------------------|
| 1             | GTR+I+G           | 868               | 12Snonpairing, 16Snonpairing                         |
| 2             | GTR+I+G           | 1120              | 16Spairing, COIp1, 12Spairing, cytbp3                |
| 3             | HKY+G             | 1144              | MYH6p1, RAG2p1, RAGp1                                |
| 4             | HKY+G             | 1979              | BMP4p2, 4c4p1, Glytp1, Rhodp3, RAGp2, MYH6p2, RAG2p2 |
| 5             | K80+G             | 490               | RAGp3                                                |
| 6             | HKY+G             | 537               | Rhodp1, Rhodp2, BMP4p1                               |
| 7             | HKY+G             | 488               | 4c4p2, Glytp2                                        |
| 8             | K80+G             | 487               | Glytp3, 4c4p3                                        |
| 9             | GTR+I             | 160               | BMPp3                                                |
| 10            | HKY+I+G           | 592               | COIp2, cytbp1                                        |
| 11            | GTR+G             | 226               | COIp3                                                |
| 12            | GTR+G             | 365               | cytbp2                                               |
| 13            | HKY+G             | 652               | RAG2p3, MYH6p3                                       |

**Supplemental Table 5: Taxon coverage of phenotypic data**

|                                       | Life Stage | Fin aspect ratios | Fin incidence angles | Body Shape | Fin Shapes |
|---------------------------------------|------------|-------------------|----------------------|------------|------------|
| <i>Abalistes stellaris</i>            | Adult      | +                 | +                    | +          | +          |
|                                       | Juvenile   | +                 | +                    | +          | +          |
| <i>Abalistes stellatus</i>            | Adult      | +                 | +                    | +          | +          |
|                                       | Juvenile   | ---               | ---                  | ---        | ---        |
| <i>Balistes undulates</i>             | Adult      | +                 | +                    | +          | +          |
|                                       | Juvenile   | +                 | +                    | +          | +          |
| <i>Balistes capriscus</i>             | Adult      | +                 | +                    | +          | +          |
|                                       | Juvenile   | +                 | +                    | +          | +          |
| <i>Balistes polylepis</i>             | Adult      | +                 | +                    | +          | +          |
|                                       | Juvenile   | ---               | ---                  | ---        | ---        |
| <i>Balistes punctatus</i>             | Adult      | +                 | +                    | +          | +          |
|                                       | Juvenile   | ---               | ---                  | ---        | ---        |
| <i>Balistes vetula</i>                | Adult      | +                 | +                    | +          | +          |
|                                       | Juvenile   | +                 | +                    | +          | +          |
| <i>Balistoides conspicillum</i>       | Adult      | +                 | +                    | +          | +          |
|                                       | Juvenile   | +                 | +                    | +          | +          |
| <i>Balistoides viridescens</i>        | Adult      | +                 | +                    | +          | +          |
|                                       | Juvenile   | +                 | +                    | +          | +          |
| <i>Canthidermis maculata</i>          | Adult      | +                 | +                    | +          | +          |
|                                       | Juvenile   | +                 | +                    | +          | +          |
| <i>Canthidermis sufflamen</i>         | Adult      | +                 | +                    | +          | +          |
|                                       | Juvenile   | +                 | +                    | +          | +          |
| <i>Melichthys indicus</i>             | Adult      | +                 | +                    | +          | +          |
|                                       | Juvenile   | ---               | ---                  | ---        | ---        |
| <i>Melichthys niger</i>               | Adult      | +                 | +                    | +          | +          |
|                                       | Juvenile   | +                 | +                    | +          | +          |
| <i>Melichthys vidua</i>               | Adult      | +                 | +                    | +          | +          |
|                                       | Juvenile   | ---               | ---                  | ---        | ---        |
| <i>Odonus niger</i>                   | Adult      | +                 | +                    | +          | +          |
|                                       | Juvenile   | +                 | +                    | +          | +          |
| <i>Pseudobalistes flavimarginatus</i> | Adult      | +                 | +                    | +          | +          |
|                                       | Juvenile   | +                 | +                    | +          | +          |
| <i>Pseudobalistes fuscus</i>          | Adult      | +                 | +                    | +          | +          |
|                                       | Juvenile   | +                 | +                    | +          | +          |
| <i>Pseudobalistes naufragium</i>      | Adult      | +                 | +                    | +          | +          |
|                                       | Juvenile   | +                 | +                    | +          | +          |
| <i>Rhinecanthus aculeatus</i>         | Adult      | +                 | +                    | +          | +          |



|                                    |          |     |     |     |     |
|------------------------------------|----------|-----|-----|-----|-----|
|                                    | Juvenile | +   | +   | +   | +   |
| <i>Rhinecanthus assasi</i>         | Adult    | +   | +   | +   | +   |
|                                    | Juvenile | +   | +   | +   | +   |
| <i>Rhinecanthus lunula</i>         | Adult    | +   | +   | +   | +   |
|                                    | Juvenile | --- | --- | --- | --- |
| <i>Rhinecanthus rectangulus</i>    | Adult    | +   | +   | +   | +   |
|                                    | Juvenile | +   | +   | +   | +   |
| <i>Rhinecanthus verrucosus</i>     | Adult    | +   | +   | +   | +   |
|                                    | Juvenile | +   | +   | +   | +   |
| <i>Sufflamen albicaudatum</i>      | Adult    | +   | +   | +   | +   |
|                                    | Juvenile | +   | +   | +   | +   |
| <i>Sufflamen bursa</i>             | Adult    | +   | +   | +   | +   |
|                                    | Juvenile | +   | +   | +   | +   |
| <i>Sufflamen chrysopterum</i>      | Adult    | +   | +   | +   | +   |
|                                    | Juvenile | +   | +   | +   | +   |
| <i>Sufflamen fraenatum</i>         | Adult    | +   | +   | +   | +   |
|                                    | Juvenile | +   | +   | +   | +   |
| <i>Sufflamen verres</i>            | Adult    | +   | +   | +   | +   |
|                                    | Juvenile | --- | --- | --- | --- |
| <i>Xanthichthys auromarginatus</i> | Adult    | +   | +   | +   | +   |
|                                    | Juvenile | --- | --- | --- | --- |
| <i>Xanthichthys lineopunctatus</i> | Adult    | +   | +   | +   | +   |
|                                    | Juvenile | +   | +   | +   | +   |
| <i>Xanthichthys mento</i>          | Adult    | +   | +   | +   | +   |
|                                    | Juvenile | --- | --- | --- | --- |
| <i>Xanthichthys ringens</i>        | Adult    | +   | +   | +   | +   |
|                                    | Juvenile | +   | +   | +   | +   |

Presence/absence of phenotypic trait data between adult and juvenile triggerfishes.

Fin aspect ratios = both dorsal and anal fin aspect ratios, fin incidence angles = the presence of incidence angles for both the anal and dorsal fins, fin shapes = shape data for both the anal and dorsal fins. + = presence of data; --- = absence of data.

**Supplemental Table 6: Percent variation captured by each relative warp axis**

|          | <i>Anal Fin</i> | <i>Dorsal Fin</i> | <i>Body Shape</i> |
|----------|-----------------|-------------------|-------------------|
| RelWarp1 | 38.25           | 49.8              | 41.2              |
| RelWarp2 | 35.24           | 24.3              | 20                |
| RelWarp3 | 15.74           | 13.8              | 13.2              |

**Figure S1:** Landmarks and measurements used for analyses. (A) Landmarks (dark) and sliding semi-landmarks (light) used for shape analyses of the body. (B) Graphical representation of landmarks (dark) and sliding semi-landmarks (light) used for shape analyses of the fin and areas measured to quantify the emergent mechanical properties of the fins. Numbers correspond to points discussed in the primary text.

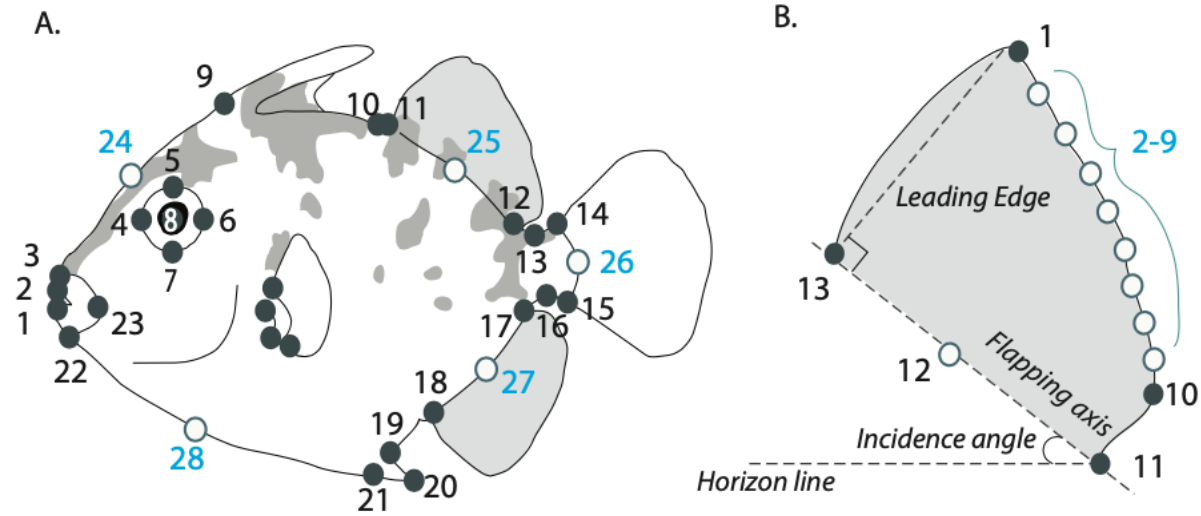

**Figure S2:** Divergence time estimates of Balistidae. (A) Comparison of divergence time estimated using all loci (left) versus estimates based on loci filtered by (B) PI profile shape. (C) Comparison of branch length 95% HPD intervals between the two datasets. (D) Comparison of age estimates between four data inclusion and partitioning strategies and the prior expectation for crown triggerfishes, filefishes, and the most recent common ancestor of triggerfishes and pufferfishes.

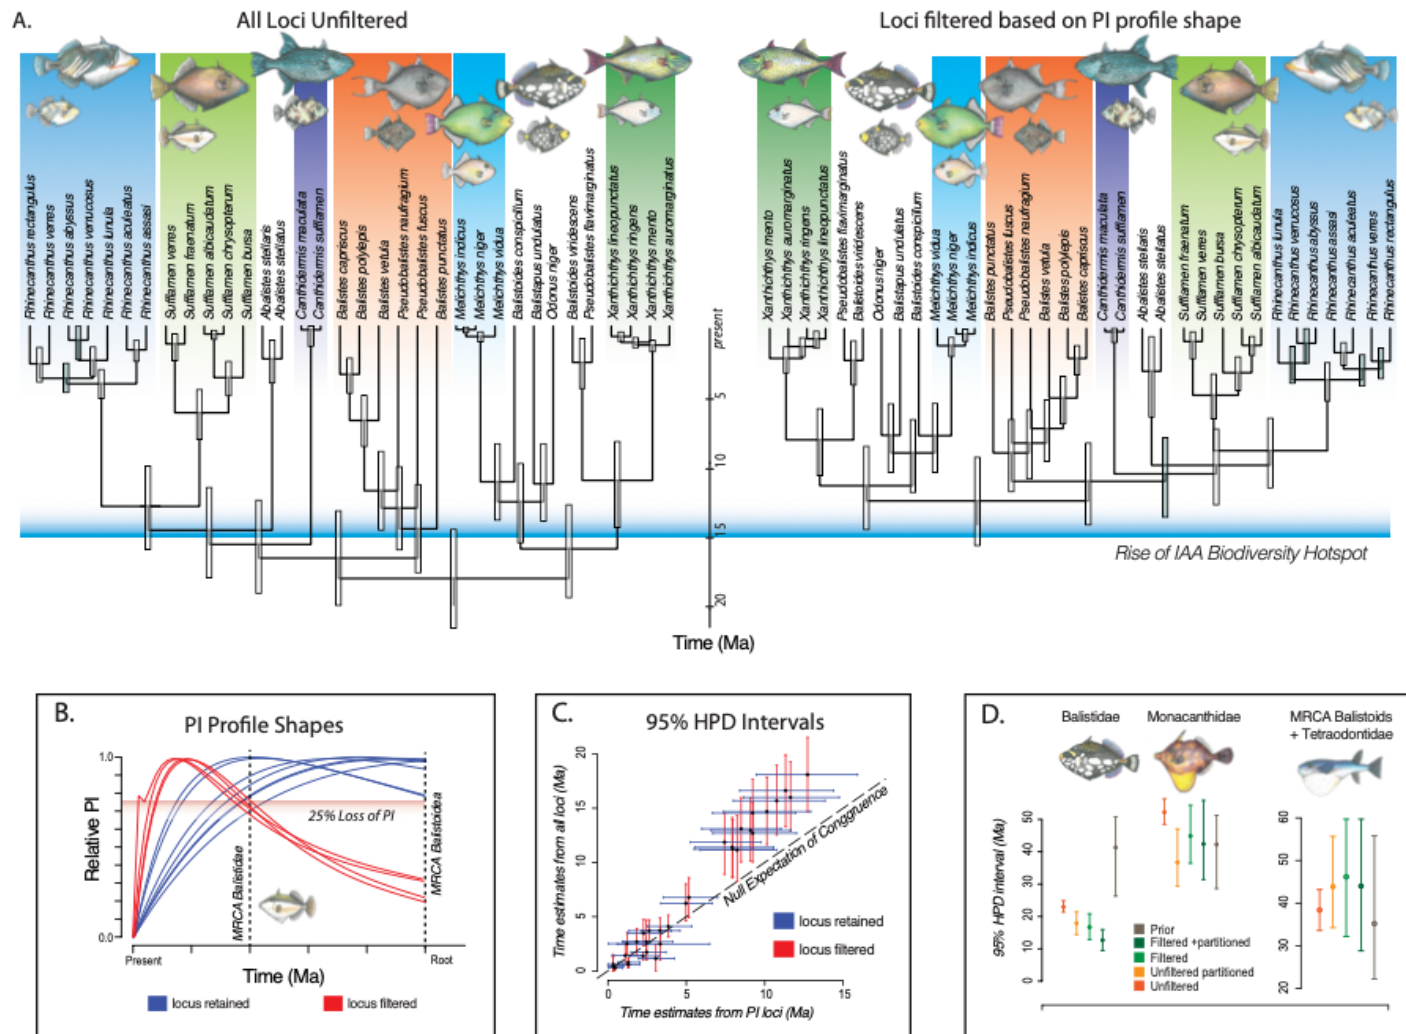

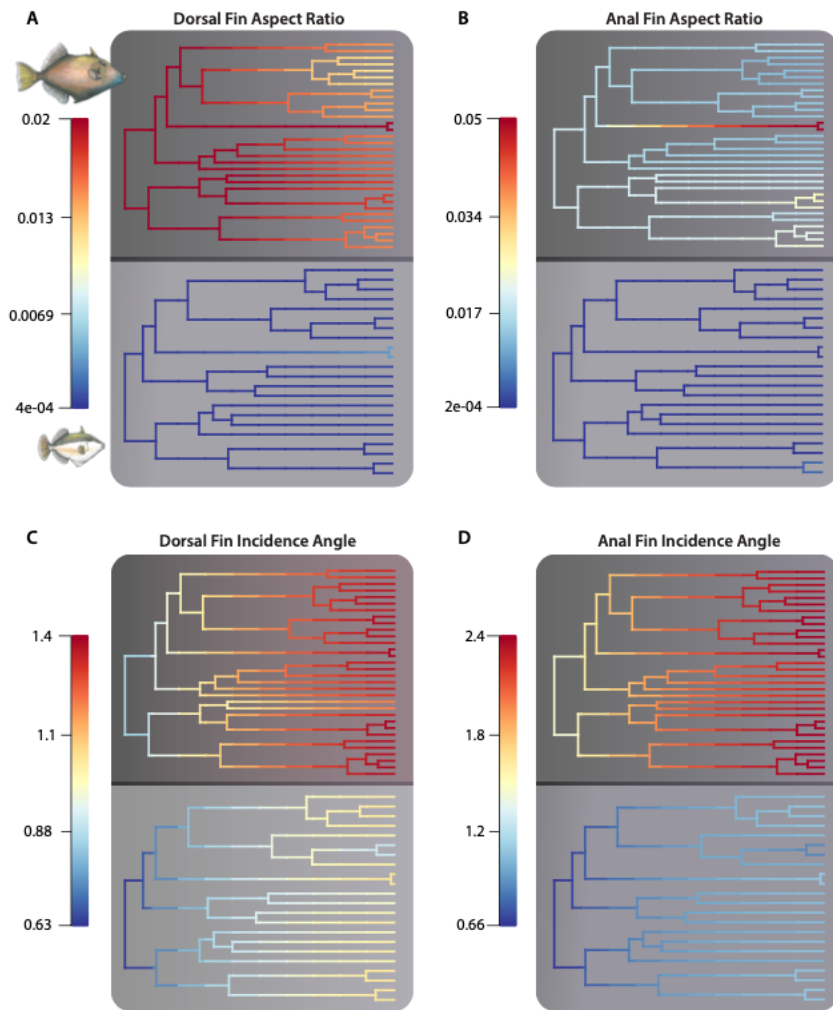

**Figure S3.** Visualization of rates of trait diversification between adults (top) and juveniles (bottom) for A) dorsal fin aspect ratio; B) anal fin aspect ratio; C) dorsal fin incidence angle; and D) anal fin incidence angle.

## References

- Aiken, K.A., 1975. The biology, ecology and bionomics of Caribbean reef fishes: Balistidae (Triggerfishes). Research report number 3, Zoology Department, University of the West Indies, Kingston, Jamaica, 57 pp.
- Bacchet, P., T. Zysman and Y. Lefèvre, 2006. Guide des poissons de Tahiti et ses îles. Tahiti (Polynésie Française): Editions Au Vent des Ôles. 608 p.
- Ballard, S.E. and Rakocinski, C.F., 2012. Flexible feeding strategies of juvenile gray triggerfish (*Balistes capriscus*) and planehead filefish (*Stephanolepis hispidus*) within Sargassum habitat. *Gulf and Caribbean Research*, 24(1), pp.31-40.
- Bean, K., Jones, G.P., Caley, M.J. 2002. Relationships among distribution, abundance, and microhabitat specialization in a guild of coral reef triggerfish (family Balistidae). *Mar Ecol. Prog. Ser.* 233: 263–272.
- Bussing, W.A., 1995. Balistidae. Pejepercos, calafates, gatillos. p. 905-909. In W. Fischer, F. Krupp, W. Schneider, C. Sommer, K.E. Carpenter and V. Niem (eds.) Guia FAO para Identificación de Especies para los Fines de la Pesca. Pacífico Centro-Oriental. 3 Vols. FAO, Rome.
- Cervigón, F., R. Cipriani, W. Fischer, L. Garibaldi, M. Hendrickx, A.J. Lemus, R. Márquez, J.M. Poutiers, G. Robaina and B. Rodríguez, 1992. Fichas FAO de identificación de especies para los fines de la pesca. Guía de campo de las especies comerciales marinas y de aguas salobres de la costa septentrional de Sur América. FAO, Rome. 513 p. Preparado con el financiamiento de la Comisión de Comunidades Europeas y de NORAD.
- Coston-Clements, L. Settle, L.R., Hoss, D.E., Cross, F.A. 1991. Utilization of the sargassum habitat by marine invertebrates and vertebrates - a review. NOAA Technical Memorandum NMFS-SEFSC-296, 32 p.
- Dianne J. Bray, 2011, Starry Triggerfish, *Abalistes stellatus*, in Fishes of Australia, accessed 06 Jul 2016, <http://fishesofaustralia.net.au:8084/home/species/759>
- Fischer, W., I. Sousa, C. Silva, A. de Freitas, J.M. Poutiers, W. Schneider, T.C. Borges, J.P. Feral and A. Massinga, 1990. Fichas FAO de identificação de especies para actividades de pesca. Guia de campo das especies comerciais marinhas e de águas salobras de Mozambique. Publicação preparada em colaboração com Instituto de Investigação Pesqueira de Mozambique, com financiamento do Projecto PNUD/FAO MOZ/86/030 e de

NORAD. Roma, FAO. 1990. 424 p.

Hoffmayer, E.R., Franks, J.S., Comyns, B.H., Hendon, J.R. and Waller, R.S., 2005. Larval and juvenile fishes associated with pelagic Sargassum in the north-central Gulf of Mexico.

Hoover, J.P. Hawaii's fishes. A guide for snorkelers, divers, and aquarists. 2003. Mutual Publishing. Honolulu, Hawaii. 184 p.

Kells, V., Rocha, L.A., Allen, L.G. 2016. A field guide to coastal fishes. From Alaska to California. Johns Hopkins Press. Baltimore, Maryland. 367 p.

Kuiter, R.H. and T. Tonozuka, 2001. Pictorial guide to Indonesian reef fishes. Part 3. Jawfishes – Sunfishes, Opistognathidae - Molidae. Zoonetics, Australia. p. 623-893.

Kuwamura, T. 1991. Habitat segregation, coexistence, or interspecific territoriality between two triggerfishes, *Rhinecanthus aculeatus* and *Sufflamen chrysopterus*, with notes on distribution of other balistids at Sesoko Island, Okinawa.

Lieske, E. and R. Myers, 1994. Collins Pocket Guide. Coral reef fishes. Indo-Pacific & Caribbean including the Red Sea. Haper Collins Publishers, 400 p.

Longley, W.H. and S.F. Hildebrand. 1941. Systematic catalogue of fishes of Tortugas, Florida. Carnegie Inst. Wash. Publ. 535. 331 p.

Lyczkowski-Shultz, J., Ingram, G.W. 2003. Preliminary guide to the identification of the early life stages of balistid fishes of the western central north Atlantic. NOAA Technical Memorandum NMFS-SEFSC-493, 13p.

Matsuura, K., 2001. Balistidae. Triggerfishes. p. 3911-3928. In K.E. Carpenter and V. Niem (eds.) FAO species identification guide for fishery purposes.

The living marine resources of the Western Central Pacific. Vol. 6. Bony fishes part 4 (Labridae to Latimeriidae), estuarine crocodiles. FAO, Rome.

Myers, R.F., 1991. Micronesian reef fishes. Second Ed. Coral Graphics, Barrigada, Guam. 298 p.

Nunoo, F.K.E., Eggleston, D.B. and Vanderpuye, C.J., 2006. Abundance, biomass and species composition of nearshore fish assemblages in Ghana, West Africa. *African Journal of Marine Science*, 28(3-4), pp.689-696.

Randall, J.E. 1968. Caribbean reef fishes. T.F.H. Publ., Neptune City, New Jersey.

Randall, J.E., Mundy, B.C. 1998. *Balistes polylepis* and *Xanthichthys caeruleolineatus*, two large triggerfishes (Tetraodontiformes: Balistidae) from the

Hawaiian Islands, with a key to Hawaiian species.

Robertson, D.R., 1988. Extreme variation in settlement of the Caribbean triggerfish *Balistes vetula* in Panama. *Copeia*, pp.698-703.

Thomson, D.A., Findley, L.T., Kerstitch, A.N.. 1979. Reef fishes of the Sea of Cortez. University of Arizona Press, Tucson, AZ. 302 p.
